# Supplementary material for: Regression of EGFR positive established solid tumors in mice with the conditionally active T cell engager TAK-186
Source: HighWire-hosted journal article supplement (doi:10.1136/jitc-2021-004336), 2022-06-01
Supplement: jitc-2021-004336supp005_data_supplement.pdf [file jitc-2021-004336supp005_data_supplement.pdf]

|                       | <b>HT29</b>                      | <b>Cytokine Release:<br/>pcTAK-186 EC<sub>50</sub> (pM)</b> |                                |             |              |                                |
|-----------------------|----------------------------------|-------------------------------------------------------------|--------------------------------|-------------|--------------|--------------------------------|
| <b>Effector Donor</b> | <b>TDCC EC<sub>50</sub> (pM)</b> | <b>IL-2</b>                                                 | <b>IFN-<math>\gamma</math></b> | <b>IL-6</b> | <b>IL-10</b> | <b>TNF-<math>\alpha</math></b> |
| D001004712            | 0.11                             | 8.8                                                         | 7.9                            | 11          | 5.6          | 7.6                            |
| D001004668            | 0.20                             | 0.7                                                         | 1.1                            | 0.84        | 0.6          | 0.63                           |
| D001004000            | 0.24                             | 1.7                                                         | 2.1                            | 0.66        | 0.99         | 1.7                            |
| D001003791            | 0.34                             | 1.7                                                         | 1.7                            | 0.62        | 1.3          | 1.6                            |
| D001004192            | 0.57                             | 3.2                                                         | 4.2                            | 3.4         | 1.9          | 3.1                            |

|                       | <b>LoVo</b>                      | <b>Cytokine Release:<br/>pcTAK-186 EC<sub>50</sub> (pM)</b> |                                |             |              |                                |
|-----------------------|----------------------------------|-------------------------------------------------------------|--------------------------------|-------------|--------------|--------------------------------|
| <b>Effector Donor</b> | <b>TDCC EC<sub>50</sub> (pM)</b> | <b>IL-2</b>                                                 | <b>IFN-<math>\gamma</math></b> | <b>IL-6</b> | <b>IL-10</b> | <b>TNF-<math>\alpha</math></b> |
| D001004712            | 0.05                             | 12.2                                                        | 6.8                            | 9.5         | 9.8          | 9.1                            |
| D001004668            | 0.11                             | 0.79                                                        | 0.63                           | 0.58        | 0.28         | 0.98                           |
| D001004000            | 0.15                             | 2.5                                                         | 1.7                            | 0.42        | 0.66         | 2.8                            |
| D001003791            | 0.22                             | 1.5                                                         | 1.6                            | 0.83        | 0.95         | 1.4                            |
| D001004192            | 0.37                             | 4                                                           | 4.3                            | 3.4         | 2.2          | 2.3                            |
