# Supplementary material for: Regression of EGFR positive established solid tumors in mice with the conditionally active T cell engager TAK-186
Source: HighWire-hosted journal article supplement (doi:10.1136/jitc-2021-004336), 2022-06-01
Supplement: jitc-2021-004336supp006_data_supplement.pdf [file jitc-2021-004336supp006_data_supplement.pdf]

| Recombinant Protein Species | adTAK-186 |          | TAK-186 |         |          |               |
|-----------------------------|-----------|----------|---------|---------|----------|---------------|
|                             | CD3ε      | EGFR     | CD3ε    | EGFR    | EGFRviii | Serum Albumin |
| Human                       | 1.7 nM    | <0.01 nM | ND      | 0.12 nM | 0.29 nM  | 11.3 nM       |
| Cynomolgus Monkey           | 2.4 nM    | <0.01 nM | ND      | 0.14 nM | NA       | 10.8 nM       |
| Mouse                       | ND        | ND       | ND      | ND      | NA       | 106.3 nM      |
