# Supplementary figures and images for: Regression of EGFR positive established solid tumors in mice with the conditionally active T cell engager TAK-186
Source: HighWire-hosted journal article supplement (doi:10.1136/jitc-2021-004336), 2022-06-01

**A.**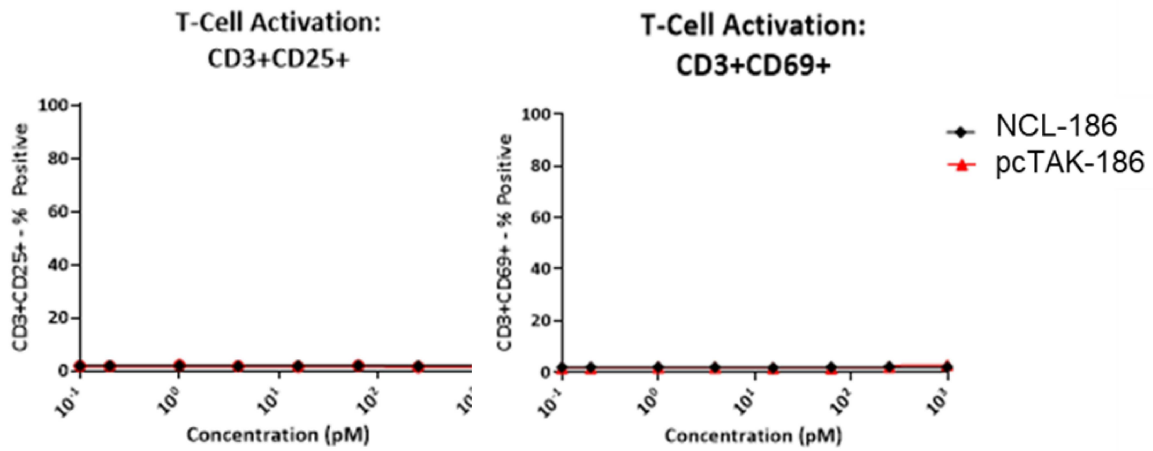**B.**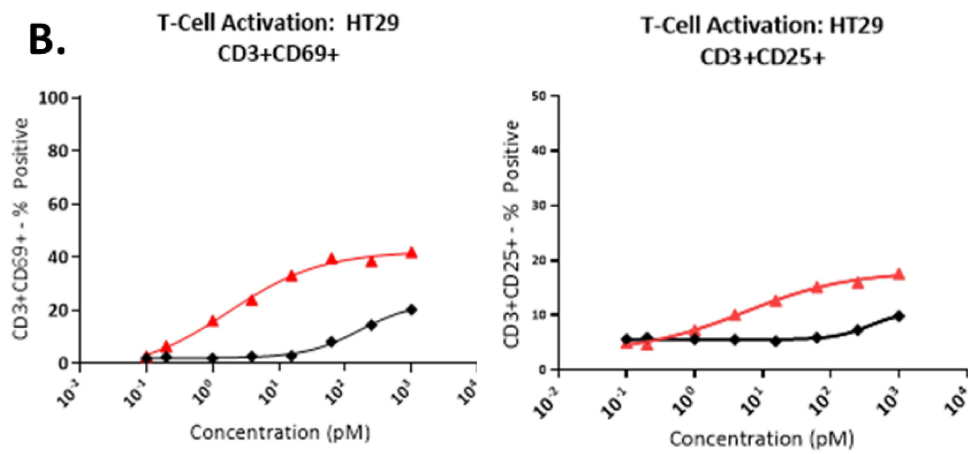

Supplement: jitc-2021-004336supp002_data_supplement.pdf [file jitc-2021-004336supp002_data_supplement.pdf]

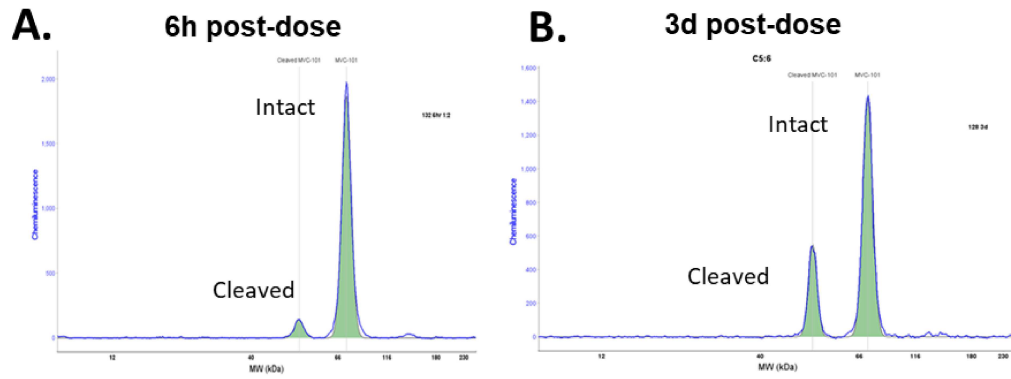

Supplement: jitc-2021-004336supp004_data_supplement.pdf [file jitc-2021-004336supp004_data_supplement.pdf]
